1     **Effects of Biogas Slurry on Fruit Economic Traits and Soil Nutrients**  
2  
                                            **of *Camellia oleifera* Abel**

3     **Short title: Effects of Biogas Slurry on *C. oleifera* Abel**

4     Lu You, Shuqin Yu, Huiyun Liu, Chutian Wang, Zengliang Zhou, Ling Zhang, Dongnan Hu\*

5     College of Forestry, Jiangxi Agricultural University, Nanchang, Jiangxi 330045, China

6     Author's Emails:

7     Lu You:1131463207@qq.com

8     Shuqin Yu:717135517@qq.com

9     HuiyunLiu:853971245@qq.com

10    Chutian Wang:344601541@qq.com

11    Zengliang Zhou:850933252@qq.com

12    Ling Zhang: lingzhang09@126.com

13    Dongnan Hu:dnhu98@163.com

14    \*Corresponding author, E-mail: dnhu98@163.com

15

16 **Abstract**

17 Soil nutrients play a principal role in *Camellia oleifera* Abel (oil-seed camellia) production. *Camellia*  
18 *oleifera* absorbs nutrients from surrounding soils and its production is highly influenced by nutrients or  
19 fertilization. In this study, we investigated the effects of biogas slurry applications on soil nutrients and  
20 economic traits of *C. oleifera* fruits. Five different amounts of fertilizing biogas slurry (0, 10, 20, 30, or  
21 40 kg/plant/year from three applications per year) were applied to *C. oleifera* plants in 2015 and 2016.  
22 Rhizosphere soil nutrients and *C. oleifera* fruit economic traits (yield, seed rate, and oil yield) were  
23 measured. Fertilization with biogas slurry increased soil organic matter, available nitrogen (N),  
24 phosphorus (P), and potassium (K) in both 2015 and 2016. Increases in soil available N, P, and K were  
25 largest at the highest slurry application rate and second largest at the second highest application rate.  
26 Fruit economic traits were maximized at the two highest application rates. Oil yield was correlated  
27 with soil available P in 2015 and 2016, and soil organic matter in 2015. Fertilization with biogas slurry  
28 decreased saturated fatty acid content in fruit but had no effect on unsaturated fatty acid content. In  
29 conclusion, fertilization with biogas slurry increases rhizosphere soil nutrients and fruit economic traits  
30 of *C. oleifera* with the rates of at least 30 kg/plant/year having the most positive effects.

31 **Keywords:** *Camellia oleifera* Abel, biogas slurry, soil nutrients, fruit economic traits, fertilization

32

### 33 **Introduction**

34 Biogas slurry is the secondary product of the anaerobic digestion process, and is also a widely used  
35 fertilizer in agricultural production. Biogas slurry is not only an environmentally friendly organic  
36 fertilizer, but it is also an efficient utilization of waste materials. In recent years in China, livestock  
37 wastes, such as feces and urine, have become a serious problem and create extensive environmental  
38 pollution [1], while anaerobic digestion is one of the effective solutions. The main product of anaerobic  
39 digestion is biogas which is an important and clean energy source. Meanwhile, the by-product, biogas  
40 slurry is also an environmentally friendly organic fertilizer that can be used in agricultural production  
41 [2-3]. Nowadays, the use of biogas slurry in agricultural production has drastically increased in China  
42 and many other Asian countries, not only because of the high cost of chemical fertilizers, but also for  
43 the high nutrients in biogas slurry [4-5]. It was reported that more than 450 million tons of biogas  
44 slurry have been used in China each year [6]. Biogas slurry has dual effects in plant production. One is  
45 as a bio fertilizer with plentiful nitrogen (N), phosphorus (P), potassium (K), and other trace  
46 elements, and the other is as a biological pesticide due to high levels of amino acids, growth hormones,  
47 and antibiotics that promote plant growth [7-8]. Dry slurry was reported to contain <0.5% nitrogen,  
48 while the wet slurry contained 1.6% nitrogen as readily available nutrients. Because of the fermentation,  
49 ammonium ion ( $\text{NH}_4^+$ ) content and pH of the biogas slurry increased, while the concentration of carbon  
50 (C) from the dry matter reduced, and the C/N ratio also decreased [9-10]. Furthermore, biogas slurry  
51 supplies more plant-readily available N than other fertilizers [11]. The available forms of nitrogen are  
52 inorganic, including nitrate ( $\text{NO}_3$ ) and ammonium ( $\text{NH}_4$ ) and simple structured organic partly from the  
53 degradation of organic matter. The available nitrogen can directly be absorbed by plants.

54 *Camellia oleifera* C. Abel is an unusual oil shrub native to China that is distributed in 18  
55 provinces/cities and more than 1,000 districts in China. It is reported that the planting area in China is  
56 over 5,000 acres, yielding about 200,000 tons of oil per year [12]. Camellia oil is a high quality edible  
57 oil, also named tea-oil, characterized by abundant unsaturated fatty acids, e.g., oleic acid and linoleic  
58 acid [13-14]. There is a long tradition of consuming tea-oil in China, especially in South China. In  
59 recent years, the planted area of *C. oleifera* is enlarging as demand for tea-oil is increasing [15]. The  
60 key factor that determines the yield of *C. oleifera* is fertilizer application [16]. Traditional cultivation  
61 methods depend on chemical fertilizers, farm insecticides and chemical growth hormones which could  
62 lead to soil acidification, hardening, nutrient imbalances, and regression that results in reduction of

63 production [17-19].

64 The effects of slurry and other organic manures on plants and crops have been shown[20]. Liquid  
65 fermented biogas slurry, from the outlet of the biogas digester can be readily used and applied directly  
66 to crops, vegetables, fodder grass and many other plants [21-23].However, knowledge about the effects  
67 of biogas slurry on *C. oleifera* is limited. The potential benefits of biogas slurry to *C. oleifera* and its  
68 application at different amounts need to be tested. In this study, we investigated the effects of biogas  
69 slurry applications on the soil nutrients and the fruit yield of *C. oleifera* to assess whether the usage of  
70 biogas slurry could substitute partly or wholly for chemical fertilizers.

71

## 72 **Materials and methods**

73 **Materials.** This study was conducted in a *C. oleifera* plantation in Wannian, Jiangxi province in China  
74 from 2015 to 2016. The area has a typical warm and humid subtropical monsoon climate with an  
75 annual mean temperature of 17.4°C, an annual rainfall of 1808 mm, and an annual relative humidity of  
76 82%. The annual mean frost-free days are 259 d in the experimental area. The *C. oleifera* trees were  
77 planted in the red clay soil on the sunny hilly land with gradient less than 20%. The plantation in this  
78 study was seven years old, the row spacing was 3 by 3 m, and trees were 2-3 m high. The biogas slurry  
79 was prepared from pig farmyard manure using a farm biogas digester with a 200 m<sup>3</sup> capacity. The  
80 biogas slurry was moderately alkaline, low in dry matter and ammonium.

81 **Experiment design.** The experiment was carried out using a randomized block design with five  
82 treatments: (1) no biogas slurry [group B<sub>0</sub>]; (2) 10 kg of biogas slurry/plant/year [group B<sub>1</sub>]; (3) 20 kg  
83 of biogas slurry/plant/year [group B<sub>2</sub>]; (4) 30 kg of biogas slurry/plant/year [group B<sub>3</sub>]; (5) 40 kg of  
84 biogas slurry/plant/year [group B<sub>4</sub>]. All of the five treatments were not fertilized by any chemical  
85 fertilizers. The biogas slurry was fertilized by the furrow method into the drip line of trees, divided into  
86 three times a year in March, June and September. Each treatment was carried out with three plots with  
87 5 replicate plants in each plot.

88 **Detection methods.** Mixed soil samples were collected from 0-20 cm and 20-40 cm rhizosphere soil  
89 immediately after fruit harvest. The concentrations of available N, P, K and organic matter were  
90 detected by using the methods of diffusion and absorption titration, NH<sub>4</sub>F-HCl extraction and  
91 molybdenum blue colorimetric, neutral NH<sub>4</sub>OAC extraction and flame photometric, and K<sub>2</sub>Cr<sub>2</sub>O<sub>7</sub>-  
92 H<sub>2</sub>SO<sub>4</sub> and FeSO<sub>4</sub> titration. Fruits of each experimental *C. oleifera* were harvested in October 2015 and

93 2016 and the weight of fresh fruit was measured. Because *C. oliefera* yield goes up and down each year  
94 [24-25], we calculated the production trait indices by using the average statistics of 2015 and 2016.  
95 Moisture rate of fresh seed= (fresh seed weight-dry seed weight)/fresh seed weight×100%, fresh seed  
96 rate = (fresh seed weight/fresh fruit weight) × 100%, dry seed rate = (dry seed weight/fresh fruit weight)  
97 × 100%, oil rate of kernel = (fat weight/kernel weight) ×100%, oil rate of fresh fruit = oil rate of  
98 kernel×dry seed rate×100%. Fatty acids in fresh fruit weremeasured according to the GB-5009,168-  
99 2016 method, by ShimadzuGC-2010 Plusgas chromatograph [26-27].

100 **Statistical analyses.** The concentrations of organic matter, available N, P, and K between 2015 and  
101 2016 were statisticallyanalyzed for significance by ANOVA by SPSS 19.0and means were compared  
102 by LSD (least significant difference) tests at  $p<0.05$ . The effects of biogas slurry on soil nutrients  
103 (organic matter, available N, P, and K) and yield were tested by correlation analysis.

104

## 105 **Results**

106 **Effects of biogas slurry on organic matter in rhizosphere soil.** Application of biogas slurry  
107 significantly increased the organic matter concentration of soils (Fig. 1A). In the first experimental year  
108 (2015), concentrations of soil organic matter raised as the dose of biogas slurry increased. Compared to  
109 the control group B<sub>0</sub>, the organic matter concentration of B<sub>1</sub>, B<sub>2</sub>, B<sub>3</sub>, and B<sub>4</sub> groups increased by 32.2%  
110 ( $p<0.05$ ), 55.8% ( $p<0.01$ ), 70.9% ( $p<0.01$ ), and 72.6% ( $p<0.01$ ), respectively. Multiple comparison  
111 revealed no significant differences among treatments B<sub>2</sub>, B<sub>3</sub> and B<sub>4</sub>. In the second experimental year  
112 (2016), the pattern was similar to that in 2015. All biogas slurry application rates increased organic  
113 matter compared the control group with the treatments B<sub>3</sub> and B<sub>4</sub>having higher enhancement rates than  
114 those in 2015, with increments of 142.28% and 137.56%, respectively.

115 **Effects of biogas slurry on available nitrogen in rhizosphere soil.** Fertilizing with biogas slurry  
116 increased soil available nitrogen both in the first ( $P_{2015}=0.009<0.01$ ) and second ( $P_{2016}\approx 0.00<0.01$ )  
117 experimental years (Fig. 1B). Treatment B<sub>4</sub>, the highest biogas slurry dose used, caused the highest  
118 increment of available nitrogen in both 2015 (249.07%) and 2016 (499.2%), when compared to that in  
119 the control groups. Soil available nitrogen decreased from 2015 to 2016 in the no slurry addition control  
120 group. The lower application rates of slurry (B<sub>1</sub>, B<sub>2</sub>) had similar levels of soil available N in the two  
121 experimental years but at the second highest slurry addition rate (B<sub>3</sub>), soil available nitrogen continued

122 to increase in the second year.

123 **Effects of biogas slurry on available phosphorus in rhizosphere soil.** All four biogas slurry  
124 fertilized groups had higher concentrations of available phosphorus in 2016 than in 2015 (Fig. 1C). But,  
125 the control group had lower available phosphorus concentrations in 2016 than in 2015. In 2015, the four  
126 fertilized groups (B<sub>1</sub>, B<sub>2</sub>, B<sub>3</sub>, B<sub>4</sub>) had increments of 151.81%, 139.97%, 119.96%, and 135.82% of  
127 available P, respectively, compared to the control group. Multiple comparisons revealed no significant  
128 difference among the four fertilized groups in 2015. In 2016, compared to the control group, the  
129 enhancement of available phosphorus was larger with greater slurry addition rates (B<sub>1</sub>, B<sub>2</sub>, B<sub>3</sub>, B<sub>4</sub>) with  
130 increments of 161.95%, 188.88%, 210.10%, and 255.05%, respectively.

131 **Effects of biogas slurry on available potassium in rhizosphere soil.** Available potassium decreased  
132 from the first to the second year in the control and lowest slurry addition (B<sub>1</sub>) treatments (Fig. 1D). In  
133 2015, available K in soils increased as the amount of biogas slurry application increased especially for  
134 treatments B<sub>3</sub> and B<sub>4</sub> (43.46% and 49.68%, respectively). In 2016, treatments B<sub>3</sub> and B<sub>4</sub> still showed  
135 significant enhancements of 117.07% (p<0.01) and 132.52% (p<0.01), respectively.

136 **Effects of biogas slurry on fruit yield and main economic traits of *C. oleifera*.** The average oil yield  
137 of *C. oleifera* in 2015 and 2016 showed a highest enhancement when fertilized with at least 30 kg  
138 biogas slurry per plant each year (Table 2). There was a trend of increasing yield as the amount of  
139 biogas slurry increased. Regarding to the main economic traits of *C. oleifera*, the fresh seeds from  
140 treatments B<sub>0</sub> and B<sub>1</sub> contained highest moisture ratios, while the lowest oil yield. Compared to the  
141 control treatment B<sub>0</sub>, the oil yield of treatments B<sub>3</sub> and B<sub>4</sub> increased in 105% and 95%, respectively.

142 **Effects of biogas slurry on fatty acids of *C. oleifera* oil.** Saturated fatty acids were mainly palmitic  
143 acid and stearic acid, accounting for about 10% of the fatty acid content (Table 3). The content of  
144 palmitic acid in the control B<sub>0</sub> was the highest with all slurry application rates lowering the amounts.  
145 The effect of biogas slurry treatment on stearic acid was close to the significant level (P=0.07).  
146 Fertilizing with biogas slurry did not affect the unsaturated fatty acid content in fruit (Table  
147 3). Correlations among saturated and unsaturated fatty acids showed that oleic acid was negatively  
148 correlated with palmitic and linoleic acids, and linoleic acid was positively correlated with  $\alpha$ -  
149 linolenic acid (Table 4).

150 **Correlations among soil nutrients and fruit economic traits.** The oil rates of fresh fruit were  
151 positively correlated with soil nutrients in 2015 (N, P, K) and 2016 (organic matter; Table 5). Oil

152 ratesof kernels were positively correlated with N, P, K, and organic matter in both years (Table 5). Oil  
153 yield was positively correlated with the concentration of available P in both 2015 and 2016, and  
154 positively correlated with organic matter in 2015.

155

## 156 **Discussion**

157 *Camellia oleifera* is a woody tree species endemic in China, and one of the important economic tree  
158 species. Oil from seeds is known to benefit health and is commonly eaten in China. Becauseflowers  
159 and fruits of *C. oleifera* grow throughout the year, and mature at the same time, fertilizers must be  
160 added to achieve high yields, especially of fruit and oil [28]. It is reported that P, N, K, Ca and Mg are  
161 the primary soil nutrientslimiting *C. oleifera* yield [29].In conventional planting, chemical fertilizers  
162 are mainly used. But thelong-term useof chemical fertilizers hascaused land retirement, nutrient deficits  
163 and sealing of soil, which reduces yield [30]. To address this, new culture techniques and fertilizers  
164 should be developed and used in *C. oleifera* production. In this study, we used a new fertilizer, biogas  
165 slurry, in *C. oleifera* plantations, and investigated the response of nutrients in rhizosphere soil and the  
166 yields of*C. oleifera*.

167 Biogas slurry is a by-product of anaerobic fermentation, which plays a central role in the efforts to  
168 improve the utilization of animal manure and reduce the influence of animal excretion on surrounding  
169 environments [31-32]. During manuredigestion, about half of the carbon is released as methane and  
170 carbon dioxide (biogas), and part of the organic nitrogen is released as ammonium [33]. Ammonium is  
171 directly available to crops when it is appliedto fields. Furthermore, biogas slurry contains abundant  
172 available nitrogen, phosphorus and potassium, which are important nutrients for plants. It is reported  
173 that the supply of nitrogen from the digested slurry had a direct influence on the yield in the growing  
174 season, while the supply of phosphorus and potassium can be seen in the next year or several years [34].  
175 So, we set a two-year experimental period to investigate the effects of biogas slurry on available N, P,  
176 and K of soils and the yield of *C. oleifera* in this study. During the two-year observation, we found the  
177 fertilization of biogas slurry has positive effects on the increment of available N, P, K of soils, and also  
178 improves the fruit and oil yield of *C. oleifera*. From the results in this study, we consider biogas slurry  
179 an effective substitute for chemical fertilizer in *C. oleifera* production.

180 Biogas slurry has abundant mineral elements and organic matter that can be released slowly. These  
181 characters of biogas slurry may positively affect soil fertility indices, e.g., organic matter, available N,

182 P, and K over years [35]. A previous study evaluated the utilization ratio of NH<sub>4</sub>-N in biogas slurry,  
183 and found that more than 90% of the applied NH<sub>4</sub>-N could be used, which indicated an immediate  
184 increase in amount of the soil NH<sub>4</sub>-N [9]. Friedel *et al.* measured a 37% increase in inorganic N during  
185 the incubation of farmyard manure-derived biogas slurry in soil for 60 days [36]. Similarly, we  
186 observed a sharp enhancement of available N in soils fertilized with as little as 10 kg of biogas slurry  
187 per plant in 2015. The amounts of N supplied from some levels of biogas slurry application in this  
188 study were more than *C. oleifera* demand, so available N accumulation was observed in 2016 (Fig. 1B).  
189 Positive effects on available P and K after biogas slurry application were in accordance with that on  
190 available N, but with different increasing degrees. Available P is one of the main ecological factors  
191 limiting the increase of *C. oleifera* yield. Jun Yuan *et al.* studied responses to low P and found that *C.*  
192 *oleifera* roots secreted organic acids when the soil P is low and led to a utilization of soluble  
193 phosphates [37]. So, we just observed a slight but not sharp decrease of soil available P in the control  
194 group in 2016. Studies from Kashem *et al.* [38] demonstrated that alkaline pH could promote the  
195 availability of phosphorus in soils. It is likely that alkaline biogas slurry increased pH and, in turn, the  
196 availability of P in soils. The slow-release of nutrients in biogas slurry could contribute to the  
197 accumulation of organic matter, available N, P, and K in the second experimental year. We predict a  
198 larger promotion of nutrients in rhizosphere soil and yield of *C. oleifera* with long-term biogas slurry  
199 application.

200

## 201 **Conclusions**

202 We studied the effects of biogas slurry on nutrients in rhizosphere soil and fruit economic traits of *C.*  
203 *oleifera*. We found that the use of biogas slurry could significantly enhance the concentration of  
204 available N, P, and K in soils, and significantly improve the yield of *C. oleifera*. In the first year, soils  
205 had higher concentrations of N, P, and K after treatment with biogas slurry and these enhancements  
206 were larger in the second year. Fertilized yield of *C. oleifera* oil also increased in the two experimental  
207 years, especially with higher application rates. Yield of oil also showed association to the increasing  
208 discipline of soil available N, P, and K in rhizosphere soils. Addition rates of at least 30 kg/plant/year  
209 (treatments B<sub>3</sub> and B<sub>4</sub>) had the highest yield of fresh fruit, fresh seed rate, and dry seed rate, and  
210 resulted in a higher oil yield per plant. Because amounts beyond 30 kg biogas slurry per plant had no  
211 additional benefit to yield, so 30 kg biogas slurry per plant is likely the optimal rate of addition. We



212 concludethatbiogas slurry has plays an important role in the production increasing of *C. oleifera*, and  
213 might be an effective substitution of chemical fertilizer in *C. oleifera* production.

214

215 **Acknowledgements** This study was financially supported by National Natural ScienceFoundation  
216 of China (grant number: 31560218, 41501317). The authors have no conflicts on this study and  
217 manuscript, and also appreciate Dr. Deping Song's and Dr. Evan Siemann's help inrevising the  
218 manuscript.

219

## 220 **Author Contributions**

221 **Conceptualization:** Dongnan Hu

222 **Data curation:** Lu You, Huiyun Liu, Shuqin Yu

223 **Investigation:** Lu You, Chutian Wang, Zengliang Zhou

224 **Writing-original draft:** Lu You, Huiyun Liu, Ling Zhang

225 **Writing-review & editing:** Dongnan Hu, Lu You

226

## 227 **References**

- 228 1. Zhang C, Su H, Baeyens J, Tan T (2014) Reviewing the anaerobic digestion of food waste for  
229 biogas production. *Renewable and Sustainable Energy Reviews*. 38: 383-392.
- 230 2. D'Imporzano G, Pilu R, Corno L, Adani F (2018) *Arundodonax* L. can substitute traditional energy  
231 crops for more efficient, environmentally-friendly production of biogas: A Life Cycle Assessment  
232 approach. *Bioresource Technology* 267: 249-256.
- 233 3. Holm-Nielsen JB, Al Seadi T, Oleskowicz-Popiel P (2009) The future of anaerobic digestion and  
234 biogas utilization. *Bioresource Technology* 100(22): 5478-5484.
- 235 4. Surendra KC, Takara D, Hashimoto AG, Khanal SK (2014) Biogas as a sustainable energy source  
236 for developing countries: Opportunities and challenges. *Renewable and Sustainable Energy  
237 Reviews* 31: 846-859.
- 238 5. Li JS, Duan N, Guo S, Shao L, Lin C, Wang JH, Hou J, Hou Y, Meng J, Han MY (2012)  
239 Renewable resource for agricultural ecosystem in China: Ecological benefit for biogas by-product  
240 for planting. *Ecological Informatics* 12: 101-110.
- 241 6. Mao C, Feng Y, Wang X, Ren G (2015) Review on research achievements of biogas from anaerobic  
242 digestion. *Renewable and Sustainable Energy Reviews* 45: 540-555.
- 243 7. Banik S, Nandi R (2004) Effect of supplementation of rice straw with biogas residual slurry manure  
244 on the yield, protein and mineral contents of oyster mushroom. *Industrial Crops and Products*  
245 20(3): 311-319.

- 246 8. Insam H, Gómez-Brandón M, Ascher J (2015) Manure-based biogas fermentation residues –  
247 Friend or foe of soil fertility? *Soil Biology and Biochemistry* 84: 1-14.
- 248 9. Terhoeven-Urselmans T, Scheller E, Raubuch M, Ludwig B, Joergensen RG (2009) CO<sub>2</sub> evolution  
249 and N mineralization after biogas slurry application in the field and its yield effects on spring  
250 barley. *Applied Soil Ecology* 42(3): 297-302.
- 251 10. Hansen MN, Henriksen K, Sommer SG (2006) Observations of production and emission of  
252 greenhouse gases and ammonia during storage of solids separated from pig slurry: Effects of  
253 covering. *Atmospheric Environment* 40(22): 4172-4181.
- 254 11. Möller K, Müller T (2012) Effects of anaerobic digestion on digestate nutrient availability and crop  
255 growth: A review. *Engineering in Life Sciences* 12(3): 242-257.
- 256 12. Liang HY, Hao BQ, Chen GC, Ye H, Ma J (2017) *Camellia* as an Oilseed Crop. *HortScience* 52(4):  
257 488-497.
- 258 13. Ma J L, Ye H, RuiY K, Chen GC, Zhang N (2011) Fatty acid composition of *Camellia oleifera* oil.  
259 *Journal für Verbraucherschutz und Lebensmittelsicherheit* 6(1): 9-12.
- 260 14. Zhu XY, Lin HM, Chen X, Xie J, Wang P (2011) Mechanochemical-Assisted Extraction and  
261 Antioxidant Activities of Kaempferol Glycosides from *Camellia oleifera* Abel. *Meal*. *Journal of*  
262 *Agricultural and Food Chemistry* 59(8): 3986-3993.
- 263 15. Wang XN, Chen YZ, WU LQ, LIU RK, Yang XH, Wang R, Yang KW (2008) Oil Content and  
264 Fatty Acid Composition of *Camellia oleifera* Seed. *Journal of Central South University of*  
265 *Forestry & Technology* 28(3): 11-17.
- 266 16. Chen YZ, PengSF, Wang XN (2007) Study of high yield cultivation technologies of oil-Tea  
267 *Camellia(Camellia oleifera)*——Formulate Fertilization. *Forest research* 20(5): 650-655.
- 268 17. Carvalho FP (2006) Agriculture, pesticides, food security and food safety. *Environmental Science*  
269 *& Policy* 9(7-8): 685-692.
- 270 18. Watts DB, Torbert HA, Prior SA, Huluka G (2010) Long-term tillage and poultry litter impacts soil  
271 carbon and nitrogen mineralization and fertility. *Soil Science Society of America Journal* 74(4):  
272 1239-1247.
- 273 19. Matson PA, Parton WJ, Power AG, Swift MJ (1997) Agricultural intensification and ecosystem  
274 properties. *Science* 277(5325): 504-509.
- 275 20. Edmeades DC (2003) The long-term effects of manures and fertilisers on soil productivity and  
276 quality: a review. *Nutrient Cycling in Agroecosystems* 66(2): 165-180.
- 277 21. Hernández T, Chocano C, Moreno J, García C (2016) Use of compost as an alternative to  
278 conventional inorganic fertilizers in intensive lettuce (*Lactuca sativa* L.) crops—Effects on soil  
279 and plant. *Soil and Tillage Research* 160: 14-22.
- 280 22. Al Seadi T, Drosch B, Fuchs W, Rutz D, Janssen R (2013) 12 - Biogas digestate quality and  
281 utilization. *The Biogas Handbook: Woodhead Publishing*. pp. 267-301.
- 282 23. Bond T, Templeton MR (2011) History and future of domestic biogas plants in the developing  
283 world. *Energy for Sustainable Development* 15(4): 347-354.
- 284 24. Chen Y (2007) Physiochemical properties and bioactivities of tea seed (*Camellia oleifera*) oil.  
285 *Dissertations & Theses*

- 286 25. Liao T, Yuan DY, Zou F, Gao C, Yang Y, Zhang L, Tan XF (2014) Self-Sterility in *Camellia*  
287 *oleiferamay* Be Due to the Prezygotic Late-Acting Self-Incompatibility. Plos One 9(6): e99639.  
288 26. Su MH, Shih MC, Lin KH (2014) Chemical composition of seed oils in native Taiwanese *Camellia*  
289 species. Food Chemistry 156: 369-373.  
290 27. Tan C, Ghazali HM, Kuntom A, Tan C, Ariffin AA (2009) Extraction and physicochemical  
291 properties of low free fatty acid crude palm oil. Food Chemistry 113(2): 645-650.  
292 28. Vela P, Salinero C, Sainz MJ (2013) Phenological growth stages of *Camellia japonica*. Annals of  
293 Applied Biology 162(2): 182-190.  
294 29. He G, Zhang J, Hu X, Wu J (2011) Effect of aluminum toxicity and phosphorus deficiency on the  
295 growth and photosynthesis of oil tea (*Camellia oleifera* Abel.) seedlings in acidic red soils.  
296 ActaPhysiologiaePlantarum 33(4): 1285-1292.  
297 30. Fan T, Stewart BA, Yong W, Junjie L, Guangye Z (2005) Long-term fertilization effects on grain  
298 yield, water-use efficiency and soil fertility in the dryland of Loess Plateau in China. Agriculture,  
299 Ecosystems & Environment 106(4): 313-329.  
300 31. Rehl T, Lansche J, Müller J (2012) Life cycle assessment of energy generation from biogas—  
301 Attributional vs. consequential approach. Renewable and Sustainable Energy Reviews 16(6):  
302 3766-3775.  
303 32. Hu Y, Cheng H, Tao S (2017) Environmental and human health challenges of industrial livestock  
304 and poultry farming in China and their mitigation. Environment International 107: 111-130.  
305 33. Maqbool S, Ul Hassan A, JavedAkhtar M, Tahir M (2014) Integrated use of biogas slurry and  
306 chemical fertilizer to improve growth and yield of okra. Science Letters 2(1):56-59 .  
307 34. Liu E, Yan C, Mei X, He W, Bing SH, Ding L, Liu Q, Liu S, Fan T (2010) Long-term effect of  
308 chemical fertilizer, straw, and manure on soil chemical and biological properties in northwest  
309 China. Geoderma 158(3): 173-180.  
310 35. Zheng X, Fan J, Xu L, Zhou J (2017) Effects of Combined Application of Biogas Slurry and  
311 Chemical Fertilizer on Soil Aggregation and C/N Distribution in an Ultisol. Plos One 12(1):  
312 e170491.  
313 36. Friedel JK (2000) The effect of farming system on labile fractions of organic matter in Calcari -  
314 Epileptic Regosols. Journal of Plant Nutrition and Soil Science 163(1): 41-45.  
315 37. YuanJ, TanX F, YuanD Y, ZhangX J, YeSC, ZhouJQ(2013) Effect of phosphates on the Growth,  
316 Photosynthesis, and P Content of Oil Tea in Acidic Red Soils. Journal of Sustainable Forestry  
317 32(6): 594-604.  
318 38. Kashem MA, Akinremi OO, Racz GJ (2004) Extractable phosphorus in alkaline soils amended with  
319 high rates of organic and inorganic phosphorus. Canadian Journal of Soil Science 84(4): 459-467.  
320

## 321 **Figure Captions**

322 Fig.1 Effects of biogas slurry on contents of (A) organic matter, (B) available nitrogen, (C)  
323 phosphorus and (D) potassium in rhizosphere soil during 2015 and 2016.

324

325 **Table 1 Experimental design (Unit: kg/plant)**

| Treatments     | March | June | September | Annual total |
|----------------|-------|------|-----------|--------------|
| B <sub>1</sub> | 0     | 0    | 0         | 0            |
| B <sub>2</sub> | 4     | 3    | 3         | 10           |
| B <sub>3</sub> | 8     | 6    | 6         | 20           |
| B <sub>4</sub> | 10    | 10   | 10        | 30           |
| B <sub>5</sub> | 14    | 13   | 13        | 40           |

326

327

**Table 2 Effects of biogas slurry on yield and the main properties of *C. oleifera***

| Treatments     | Yield kg/plant         | Moisture rate of fresh seed(%) | Fresh seed rate (%)       | Dry seed rate (%)       | Oil rate of Kernel(%)    | Oil rate of fresh fruit(%) | Oil yieldkg/plant       |
|----------------|------------------------|--------------------------------|---------------------------|-------------------------|--------------------------|----------------------------|-------------------------|
| B <sub>0</sub> | 1.97±0.60 <sup>a</sup> | 44.68±2.03 <sup>a</sup>        | 54.39±8.17 <sup>b</sup>   | 33.84±7.98 <sup>a</sup> | 45.24±3.50 <sup>b</sup>  | 10.52±3.14 <sup>b</sup>    | 0.20±0.02 <sup>b</sup>  |
| B <sub>1</sub> | 2.20±1.15 <sup>a</sup> | 44.36±2.66 <sup>a</sup>        | 59.23±14.07 <sup>ab</sup> | 33.17±9.13 <sup>a</sup> | 49.28±3.16 <sup>b</sup>  | 10.31±3.92 <sup>b</sup>    | 0.23±0.12 <sup>b</sup>  |
| B <sub>2</sub> | 2.24±0.91 <sup>a</sup> | 40.49±0.11 <sup>b</sup>        | 66.82±15.98 <sup>ab</sup> | 39.77±9.54 <sup>a</sup> | 50.17±1.35 <sup>ab</sup> | 13.35±2.84 <sup>ab</sup>   | 0.28±0.09 <sup>ab</sup> |
| B <sub>3</sub> | 2.76±0.76 <sup>a</sup> | 42.30±1.33 <sup>ab</sup>       | 85.23±24.35 <sup>a</sup>  | 45.59±9.02 <sup>a</sup> | 48.77±2.89 <sup>b</sup>  | 14.40±1.74 <sup>ab</sup>   | 0.41±0.18 <sup>a</sup>  |
| B <sub>4</sub> | 2.29±0.39 <sup>a</sup> | 42.83±2.63 <sup>ab</sup>       | 69.78±14.96 <sup>ab</sup> | 43.44±7.18 <sup>a</sup> | 54.83±2.08 <sup>a</sup>  | 16.72±2.88 <sup>a</sup>    | 0.39±0.17 <sup>a</sup>  |

328

329

330 **Table 3 Saturated and unsaturated fatty acids in the fruit of *C. oleifera* fertilized by different amounts of biogas slurry**

| Treatments     | Saturated fatty acid %   |                           | Unsaturated fatty acid %  |                          |                                    |                                    |
|----------------|--------------------------|---------------------------|---------------------------|--------------------------|------------------------------------|------------------------------------|
|                | Palmitic acid<br>(C16:0) | Stearic acid<br>(C18:0)   | Oleic acid<br>(C18:1)     | Linoleic acid<br>(C18:2) | $\gamma$ -linolenic<br>acid(C18:3) | $\alpha$ -linolenic<br>acid(C18:3) |
| B <sub>0</sub> | 8.713±0.235 <sup>a</sup> | 2.127±0.170 <sup>a</sup>  | 79.743±1.25 <sup>a</sup>  | 7.416±1.170 <sup>a</sup> | 0.005±0.001 <sup>a</sup>           | 0.277±0.007 <sup>ab</sup>          |
| B <sub>1</sub> | 7.925±0.337 <sup>b</sup> | 1.927±0.152 <sup>ab</sup> | 78.695±0.574 <sup>a</sup> | 7.804±0.485 <sup>a</sup> | 0.007±0.001 <sup>a</sup>           | 0.252±0.017 <sup>b</sup>           |
| B <sub>2</sub> | 7.927±0.427 <sup>b</sup> | 2.034±0.057 <sup>ab</sup> | 79.620±0.984 <sup>a</sup> | 7.286±0.284 <sup>a</sup> | 0.005±0.002 <sup>a</sup>           | 0.260±0.013 <sup>ab</sup>          |
| B <sub>3</sub> | 8.009±0.436 <sup>b</sup> | 1.820±0.059 <sup>b</sup>  | 79.674±1.629 <sup>a</sup> | 7.695±1.308 <sup>a</sup> | 0.004±0.002 <sup>a</sup>           | 0.301±0.033 <sup>a</sup>           |
| B <sub>4</sub> | 7.982±0.138 <sup>b</sup> | 2.032±0.277 <sup>ab</sup> | 80.616±0.485 <sup>a</sup> | 6.533±0.511 <sup>a</sup> | 0.005±0.000 <sup>a</sup>           | 0.241±0.031 <sup>b</sup>           |

331  
332

333

**Table 4 Correlations among saturated and unsaturated fatty acids**

| Fattyacid                        | Correlation (significance: p-value) |                     |                   |                      |                                  |                                 |
|----------------------------------|-------------------------------------|---------------------|-------------------|----------------------|----------------------------------|---------------------------------|
|                                  | Palmiticacid(C16:0)                 | Stearic acid(C18:0) | Oleic acid(C18:1) | Linoleic acid(C18:2) | $\gamma$ - linolenic acid(C18:3) | $\alpha$ -linolenic acid(C18:3) |
| Palmiticacid(c16:0)              | 1                                   |                     |                   |                      |                                  |                                 |
| Stearic acid(C18:0)              | -0.359(0.189)                       | 1                   |                   |                      |                                  |                                 |
| Oleic acid(C18:1)                | -0.628*(0.012)                      | 0.273(0.325)        | 1                 |                      |                                  |                                 |
| Linoleic acid(C18:2)             | 0.441(0.099)                        | -0.271(0.328)       | -.0924**(0.000)   | 1                    |                                  |                                 |
| $\gamma$ - linolenic acid(C18:3) | 0.192(0.493)                        | -0.261(0.347)       | -0.211(0.451)     | 0.083(0.769)         | 1                                |                                 |
| $\alpha$ -linolenic acid(C18:3)  | -0.174(0.535)                       | -0.132(0.639)       | -0.375(0.168)     | 0.567*(0.027)        | 0.036(0.898)                     | 1                               |

334  
335  
336  
337  
338  
339  
340  
341  
342  
343  
344  
345

346 **Table 5 Correlation of oil yield components and soil nutrients**

| Nutrients of soil    | Year | Correlation (significance: p-value) |                    |                |
|----------------------|------|-------------------------------------|--------------------|----------------|
|                      |      | Oil rate of fresh fruit             | Oil rate of kernel | Oil yield      |
| Available nitrogen   | 2015 | 0.241(0.387)                        | 0.549*(0.034)      | 0.407(0.132)   |
|                      | 2016 | 0.514*(0.050)                       | 0.720**(0.002)     | 0.418(0.121)   |
| Available phosphorus | 2015 | 0.472(0.076)                        | 0.628*(0.012)      | 0.636*(0.011)  |
|                      | 2016 | 0.623*(0.013)                       | 0.681**(0.005)     | 0.719**(0.003) |
| Available potassium  | 2015 | 0.454(0.089)                        | 0.648**(0.009)     | 0.252(0.364)   |
|                      | 2016 | 0.591*(0.020)                       | 0.647**(0.009)     | 0.392(0.148)   |
| Organic matter       | 2015 | 0.681**(0.005)                      | 0.619*(0.014)      | 0.644*(0.010)  |
|                      | 2016 | 0.372(0.172)                        | 0.565*(0.028)      | 0.385(0.157)   |

347 Note: \*indicates  $p < 0.05$ ,  $\geq 0.01$ ; \*\*indicates  $p < 0.01$ .



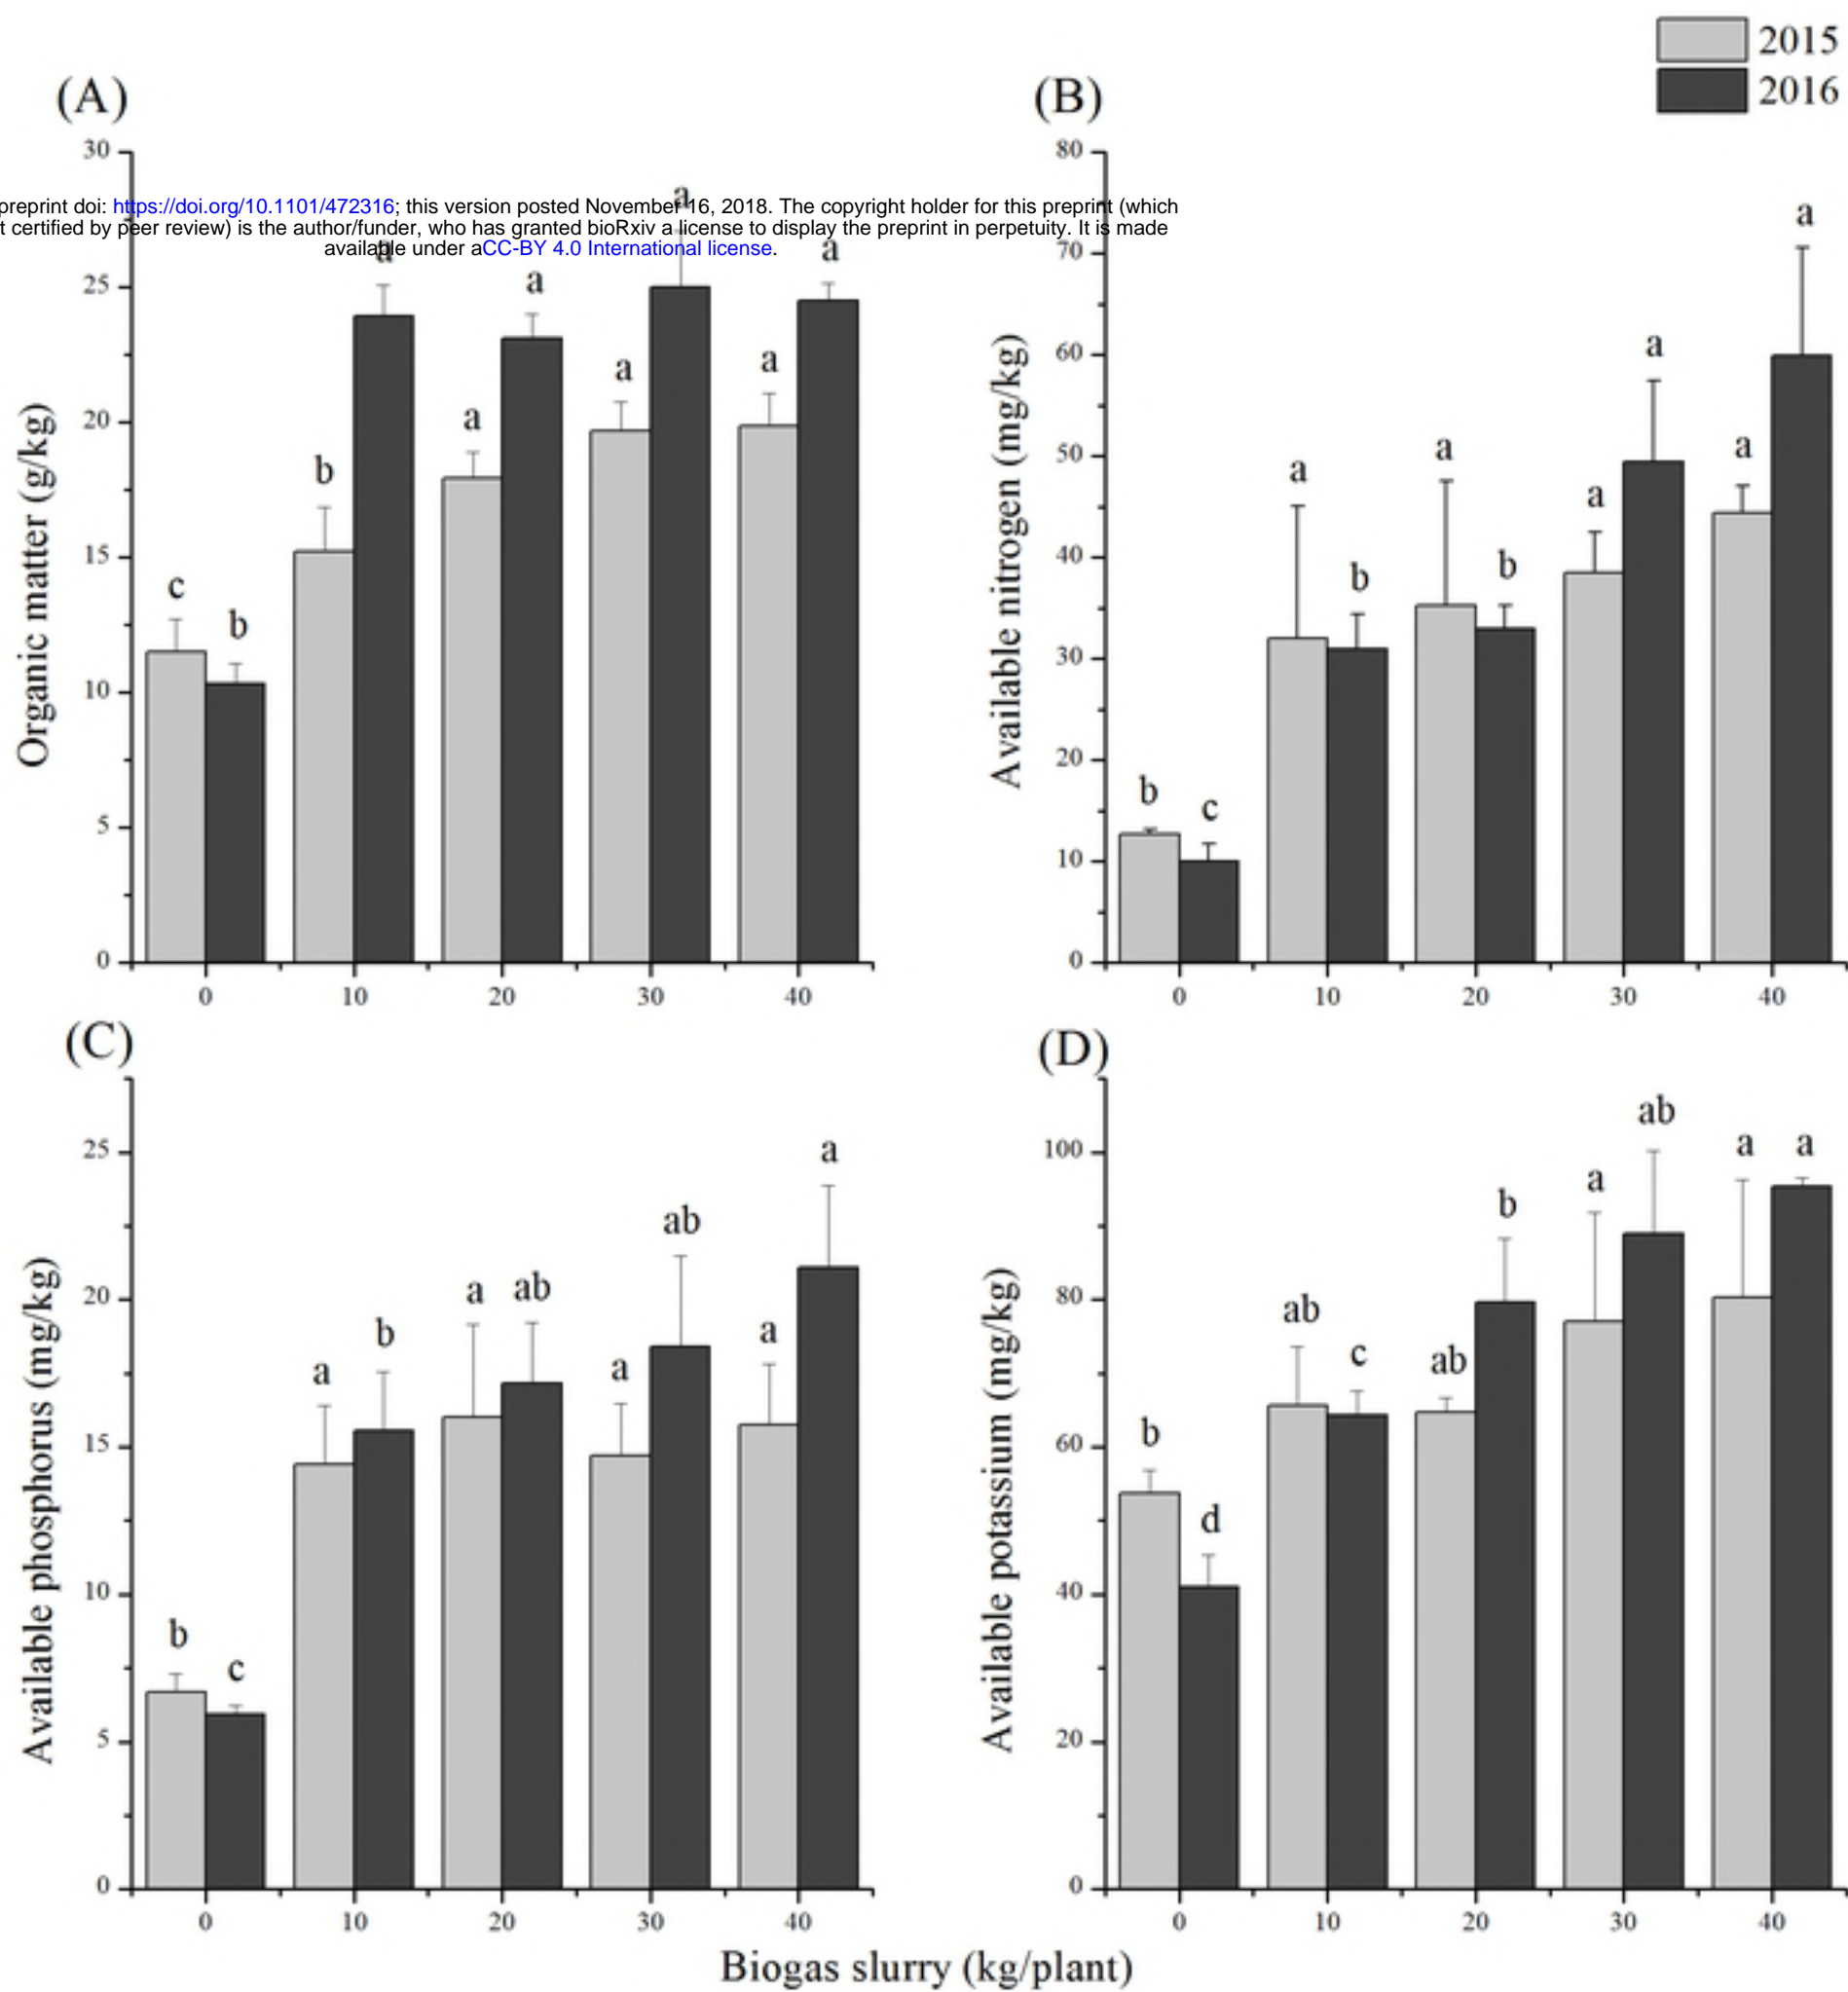

Source: http://biorxiv.org/content/10.1101/472316v1.full.pdf
